# Supplementary material
Source: PubMed Central journal article supplement (PMC4810609)

## Supplemental Information

Table S1. Strains and plasmids used in this study

| <i>C. difficile</i> strains              | Phenotype                                                                                                                                                                                                                            | Reference            |
|------------------------------------------|--------------------------------------------------------------------------------------------------------------------------------------------------------------------------------------------------------------------------------------|----------------------|
| UK1                                      | Ribotype 027                                                                                                                                                                                                                         | (1-3)                |
| 5108111                                  | Ribotype 027                                                                                                                                                                                                                         | (4)                  |
| DH1834                                   | Ribotype 027                                                                                                                                                                                                                         | (4)                  |
| DH1858                                   | Ribotype 027                                                                                                                                                                                                                         | (4)                  |
| CD2315                                   | Ribotype 078                                                                                                                                                                                                                         | (4)                  |
| M120                                     | Ribotype 078                                                                                                                                                                                                                         | (5, 6)               |
| M68                                      | Ribotype 017                                                                                                                                                                                                                         | (7, 8)               |
| JSC11                                    | <i>cspC::ermB</i>                                                                                                                                                                                                                    | (1, 3)               |
| CAA5                                     | <i>sleC::ermB</i>                                                                                                                                                                                                                    | (3)                  |
| <b><i>E. coli</i> strains</b>            |                                                                                                                                                                                                                                      |                      |
| DH5 $\alpha$                             | F <sup>-</sup> endA1 glnV44 thi-1 recA1 relA1 gyrA96 deoR nupG $\Phi$ 80 <i>dlacZ</i> $\Delta$ M15 $\Delta$ ( <i>lacZYA-argF</i> )U169, hsdR17( <i>r<sub>K</sub><sup>-</sup> m<sub>K</sub><sup>+</sup></i> ), $\lambda$ <sup>-</sup> | (9)                  |
| BL21(DE3)                                | F <sup>-</sup> ompT gal dcm lon hsdS <sub>B</sub> ( <i>r<sub>B</sub><sup>-</sup> m<sub>B</sub><sup>-</sup></i> ) $\lambda$ (DE3 [ <i>lacI lacUV5-T7 gene 1 ind1 sam7 nin5</i> ])                                                     | Novagen              |
| <b>Plasmids</b>                          |                                                                                                                                                                                                                                      |                      |
| pET22b                                   | Expression vector                                                                                                                                                                                                                    | This study (Novagen) |
| pKS02                                    | <i>cspB</i> -expressing plasmid                                                                                                                                                                                                      | This study           |
| pKS08                                    | <i>sleC</i> -expressing plasmid                                                                                                                                                                                                      | This study           |
| pEK-K-CspC                               | Codon optimized <i>cspC</i>                                                                                                                                                                                                          | This study           |
| <i>pcspC-CO-<math>\Delta</math>50CPD</i> | Codon optimized <i>cspC</i> -expressing plasmid                                                                                                                                                                                      | A. Shen (gift)       |

**Figure S1. Complete germination data for *C. difficile* strains.** Purified *C. difficile* spores of the indicated strains were suspended in BHIS medium alone (●) or medium supplemented with 2 mM (■), 5 mM (▲), 10 mM (▼), 20 mM (◆) or 50 mM (○) TA. Germination was monitored at

OD<sub>600</sub> as described previously. Experiments were performed in triplicate and each experiment is shown. Data could not be displayed as the average due to inconsistent time points generated by the spectrophotometer between experiments.

**Figure S2. Germination by certain *C. difficile* strains at lower TA concentrations.** Purified *C. difficile* spores were suspended in BHIS medium alone or medium supplemented with the indicated TA concentrations. *C. difficile* 5108111, *C. difficile* CD2315, *C. difficile* DH1834, or *C. difficile* DH1858 spores suspended in BHIS medium alone (●) or medium supplemented with 1 mM (■), 2 mM (▲), 5 mM (▼), 10 mM (◆) or 20 mM (○) TA. Experiments were performed in triplicate and each experiment is shown. Data could not be displayed as the average due to inconsistent time points between experiments which is generated by the spectrophotometer.

**Figure S3. Complete germination data for *C. difficile* spores suspended in medium supplemented with TA and CDCA.** Purified *C. difficile* spores of the indicated strains were suspended in BHIS medium supplemented with 1 mM CDCA (●) or medium supplemented with 2 mM (■), 5 mM (▲), 10 mM (▼), 20 mM (◆) or 50 mM (○) TA and 1 mM CDCA. Germination was monitored at OD<sub>600</sub> as described previously. Experiments were performed in triplicate and each experiment is shown. Data could not be displayed as the average due to inconsistent time points generated by the spectrophotometer between experiments.

**Figure S4. Alignment of CspC protein sequences.** The *cspC* gene was amplified from each of the *C. difficile* strains used in this study and sequenced. The translated sequence was aligned using the Clustal W method and only the sites where substitutions occurred are listed.

**Figure S5. Alignment of CspB protein sequences.** The *cspB* gene was amplified from each of the *C. difficile* strains used in this study and sequenced. The translated sequence was aligned using the Clustal W method and only the sites where substitutions occurred are listed.

**Figure S6. Alignment of CspA protein sequences.** The *cspA* gene was amplified from each of the *C. difficile* strains used in this study and sequenced. The translated sequence was aligned using the Clustal W method and only the sites where substitutions occurred are listed.

**Figure S7. *C. difficile* spores require TA to initiate germination.** Purified *C. difficile* spores were suspended in buffer supplemented with 100 mM glycine (●) or glycine and 10 mM taurocholic acid (○) and DPA release during spore germination was monitored using Tb<sup>3+</sup> fluorescence, described previously, for 4 hours. (A) *C. difficile* UK1, (B) *C. difficile* 5108111, (C) *C. difficile* CD2315, (D) *C. difficile* DH1834, (E) *C. difficile* DH1858, (F) *C. difficile* M68, (G) *C. difficile* M120. Data points represent the average of 3 independent experiments and error bars represent the standard error of the mean.

## REFERENCES

1. **Francis MB, Allen CA, Shrestha R, Sorg JA.** 2013. Bile acid recognition by the *Clostridium difficile* germinant receptor, CspC, is important for establishing infection. PLoS Pathog **9**:e1003356.
2. **Francis MB, Allen CA, Sorg JA.** 2013. Muricholic acids inhibit *Clostridium difficile* spore germination and growth. PLoS One **8**:e73653.
3. **Francis MB, Allen CA, Sorg JA.** 2015. Spore cortex hydrolysis precedes dipicolinic acid release during *Clostridium difficile* spore germination. J Bacteriol **197**:2276-2283.
4. **Heeg D, Burns DA, Cartman ST, Minton NP.** 2012. Spores of *Clostridium difficile* clinical isolates display a diverse germination response to bile salts. PLoS One **7**:e32381.
5. **He M, Sebahia M, Lawley TD, Stabler RA, Dawson LF, Martin MJ, Holt KE, Seth-Smith HM, Quail MA, Rance R, Brooks K, Churcher C, Harris D, Bentley SD, Burrows C, Clark L, Corton C, Murray V, Rose G, Thurston S, van Tonder A, Walker D, Wren BW, Dougan G, Parkhill J.** 2010. Evolutionary dynamics of *Clostridium difficile* over short and long time scales. Proc Natl Acad Sci U S A **107**:7527-7532.
6. **Deng K, Plaza-Garrido A, Torres JA, Paredes-Sabja D.** 2015. Survival of *Clostridium difficile* spores at low temperatures. Food Microbiol **46**:218-221.
7. **Drudy D, Harnedy N, Fanning S, O'Mahony R, Kyne L.** 2007. Isolation and characterisation of toxin A-negative, toxin B-positive *Clostridium difficile* in Dublin, Ireland. Clin Microbiol Infect **13**:298-304.
8. **Lawley TD, Clare S, Walker AW, Goulding D, Stabler RA, Croucher N, Mastroeni P, Scott P, Raisen C, Mottram L, Fairweather NF, Wren BW, Parkhill J, Dougan G.**

2009. Antibiotic treatment of *Clostridium difficile* carrier mice triggers a supershedder state, spore-mediated transmission, and severe disease in immunocompromised hosts.

Infect. Immun. **77**:3661-3669.

9. **Hanahan D.** 1983. Studies on transformation of *Escherichia coli* with plasmids. J Mol Biol **166**:557-580.

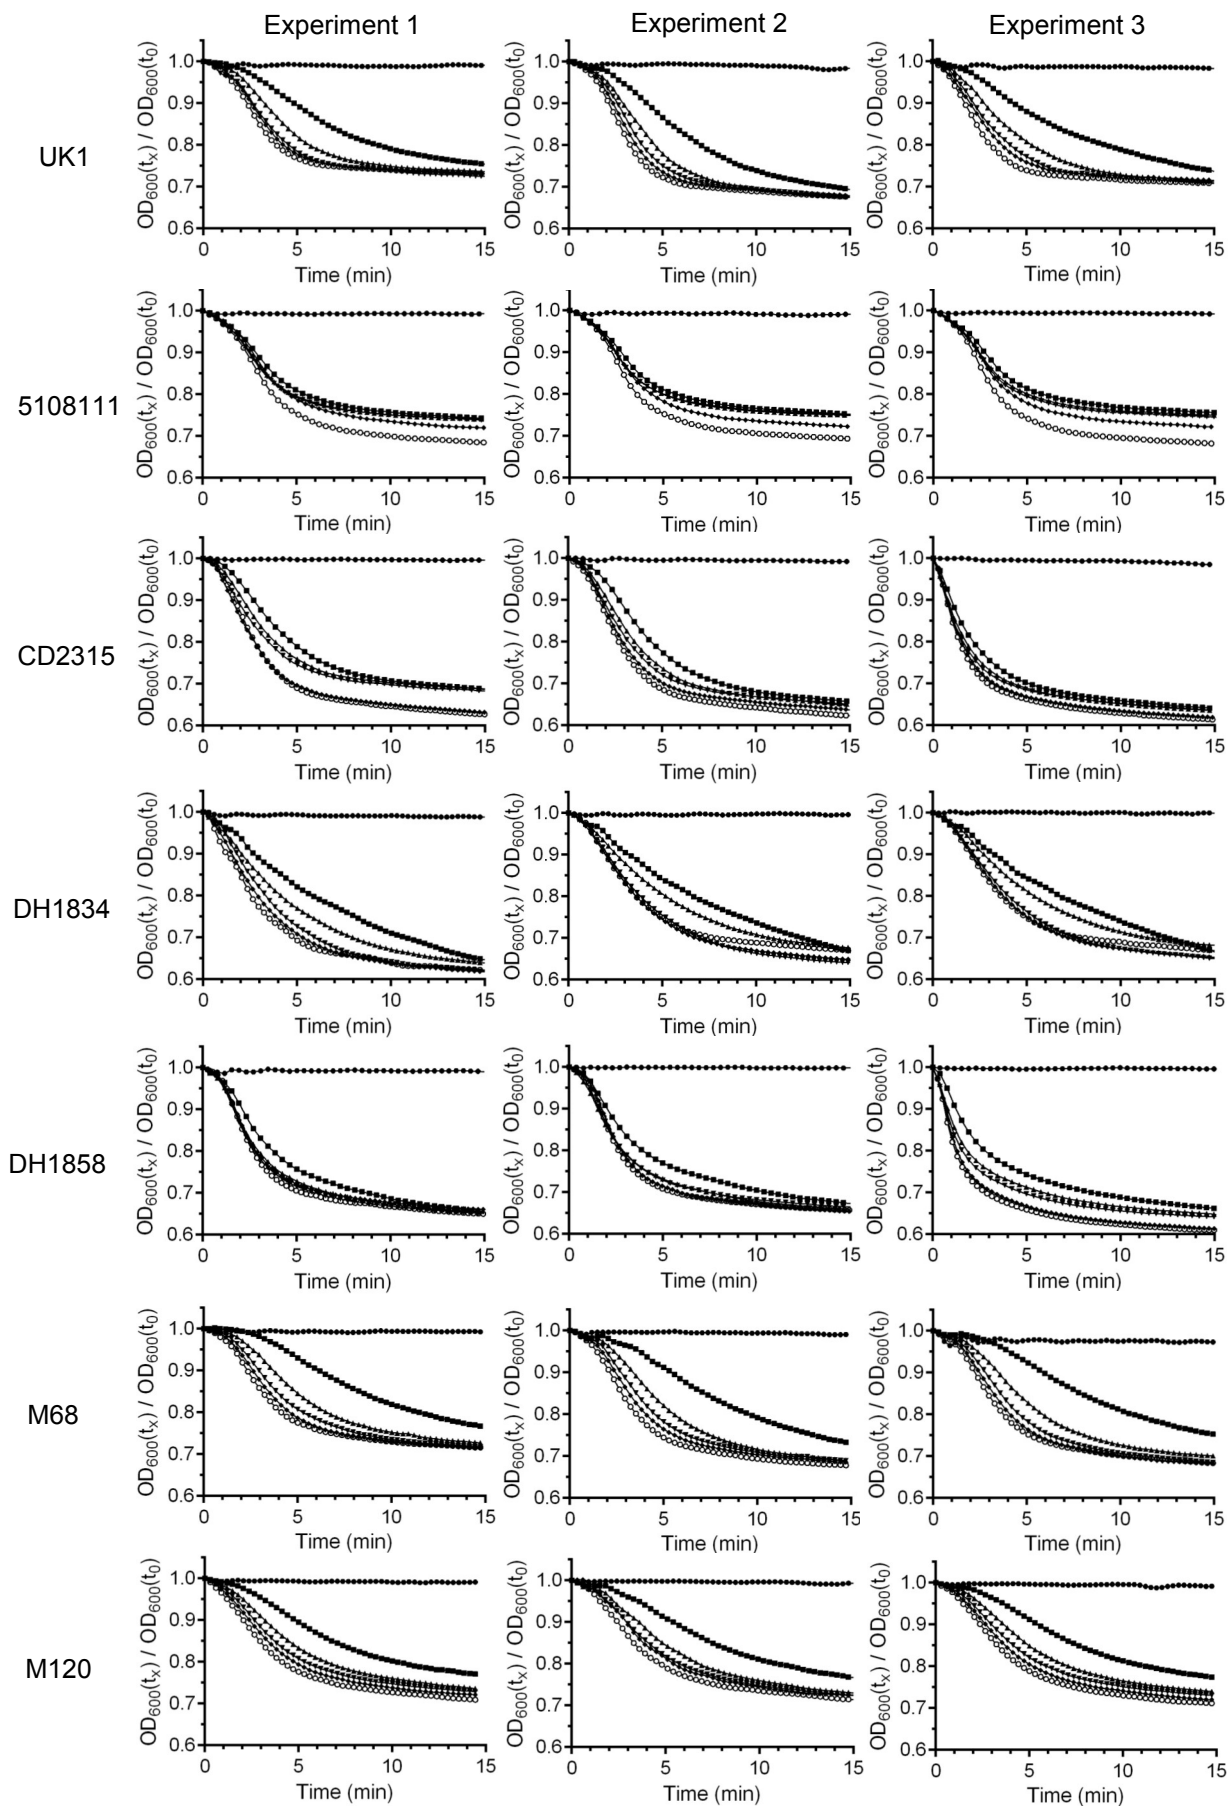

Figure S1

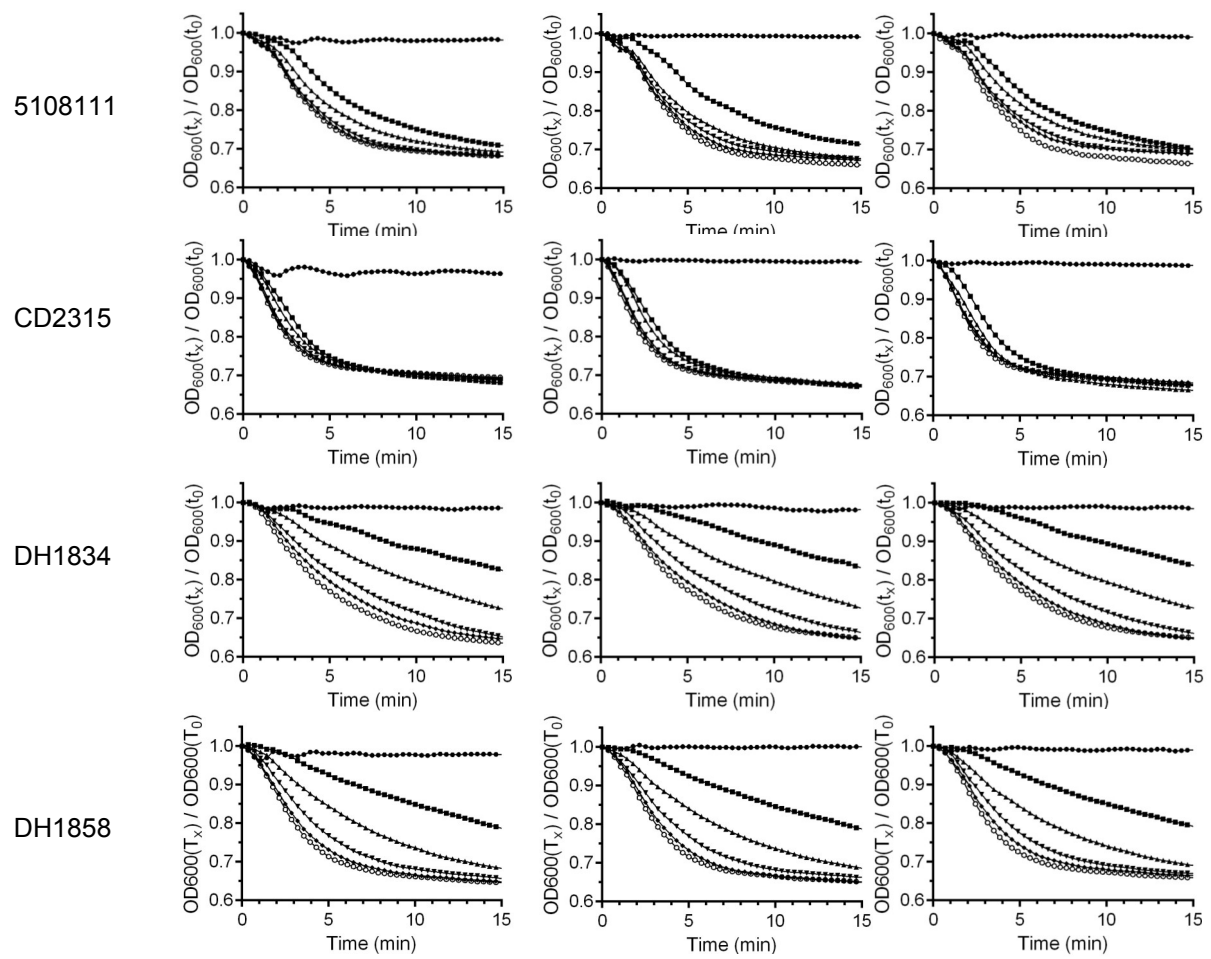

Figure S2

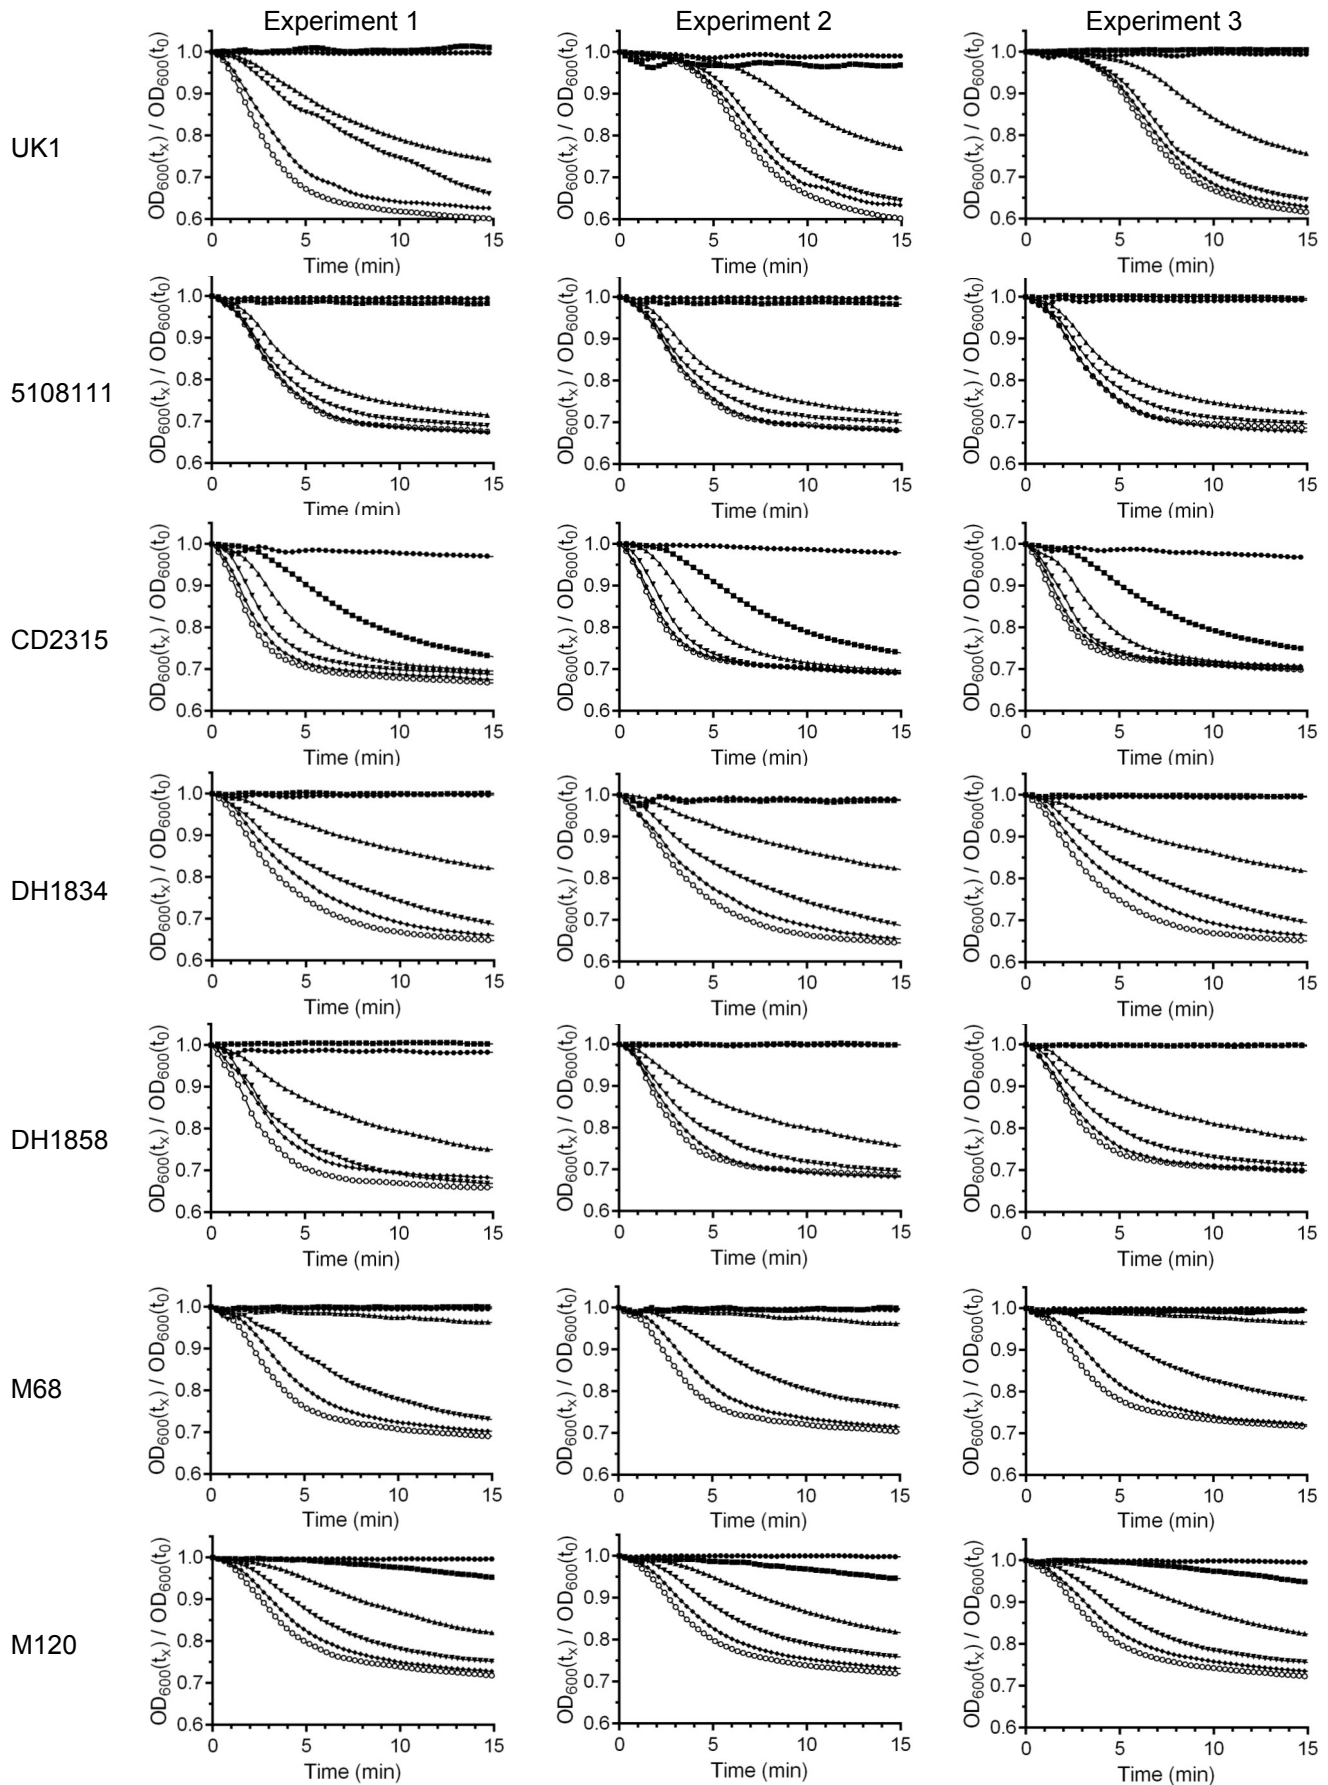

Figure S3



|         |      |      |      |      |      |      |      |      |      |      |      |      |     |
|---------|------|------|------|------|------|------|------|------|------|------|------|------|-----|
|         | 1    | 12   | 24   | 39   | 59   | 72   | 82   | 84   | 121  | 151  | 184  | 187  | 206 |
| UK1     | M... | D... | R... | V... | E... | N... | E... | D... | T... | Q... | I... | Q... | T   |
| 5108111 | M... | D... | R... | V... | E... | N... | E... | D... | T... | Q... | I... | Q... | T   |
| DH1834  | M... | D... | R... | V... | E... | N... | E... | D... | T... | Q... | I... | Q... | T   |
| DH1858  | M... | D... | R... | V... | E... | N... | E... | D... | T... | Q... | I... | Q... | T   |
| CD2315  | M... | D... | R... | I... | A... | D... | G... | E... | T... | E... | V... | K... | I   |
| M120    | M... | D... | R... | I... | A... | D... | G... | E... | T... | E... | V... | K... | I   |
| M68     | M... | N... | K... | I... | E... | N... | E... | D... | S... | E... | V... | Q... | T   |

  

|         |      |      |      |      |      |      |      |      |      |      |      |      |      |     |
|---------|------|------|------|------|------|------|------|------|------|------|------|------|------|-----|
|         | 207  | 237  | 250  | 287  | 290  | 317  | 320  | 338  | 384  | 394  | 465  | 477  | 506  | 508 |
| UK1     | D... | K... | S... | G... | S... | P... | V... | S... | I... | S... | S... | T... | D... | V   |
| 5108111 | D... | K... | S... | A... | S... | P... | V... | S... | I... | S... | S... | T... | D... | V   |
| DH1834  | D... | K... | S... | G... | S... | P... | V... | S... | I... | S... | S... | T... | D... | V   |
| DH1858  | D... | K... | S... | G... | S... | P... | V... | S... | I... | S... | S... | T... | D... | V   |
| CD2315  | G... | R... | G... | G... | S... | L... | V... | A... | T... | G... | P... | T... | N... | I   |
| M120    | G... | R... | G... | G... | S... | P... | V... | A... | T... | G... | P... | T... | N... | I   |
| M68     | D... | K... | G... | G... | N... | P... | I... | S... | I... | G... | S... | A... | D... | V   |

Figure S4

|         |     |     |     |     |     |     |     |     |     |     |   |     |   |     |   |     |   |     |   |
|---------|-----|-----|-----|-----|-----|-----|-----|-----|-----|-----|---|-----|---|-----|---|-----|---|-----|---|
|         | 1   | 62  | 110 | 211 | 267 | 287 | 311 | 360 | 362 | 367 |   |     |   |     |   |     |   |     |   |
| UK1     | M   | ... | I   | ... | D   | ... | R   | ... | Q   | ... | I | ... | A | ... | K | ... | V | ... | D |
| 5108111 | M   | ... | I   | ... | D   | ... | R   | ... | Q   | ... | I | ... | A | ... | K | ... | V | ... | D |
| DH1834  | M   | ... | I   | ... | D   | ... | R   | ... | Q   | ... | I | ... | A | ... | K | ... | V | ... | D |
| DH1858  | M   | ... | I   | ... | D   | ... | R   | ... | Q   | ... | I | ... | A | ... | K | ... | V | ... | D |
| CD2315  | M   | ... | V   | ... | N   | ... | K   | ... | R   | ... | V | ... | T | ... | R | ... | I | ... | N |
| M120    | M   | ... | V   | ... | N   | ... | K   | ... | R   | ... | V | ... | T | ... | R | ... | I | ... | N |
| M68     | M   | ... | I   | ... | D   | ... | R   | ... | Q   | ... | I | ... | A | ... | K | ... | V | ... | D |
|         | 408 | 446 | 499 | 523 |     |     |     |     |     |     |   |     |   |     |   |     |   |     |   |
| UK1     | V   | ... | I   | ... | G   | ... | I   |     |     |     |   |     |   |     |   |     |   |     |   |
| 5108111 | V   | ... | I   | ... | G   | ... | I   |     |     |     |   |     |   |     |   |     |   |     |   |
| DH1834  | V   | ... | I   | ... | G   | ... | I   |     |     |     |   |     |   |     |   |     |   |     |   |
| DH1858  | V   | ... | I   | ... | G   | ... | I   |     |     |     |   |     |   |     |   |     |   |     |   |
| CD2315  | I   | ... | V   | ... | V   | ... | V   |     |     |     |   |     |   |     |   |     |   |     |   |
| M120    | I   | ... | V   | ... | V   | ... | V   |     |     |     |   |     |   |     |   |     |   |     |   |
| M68     | I   | ... | V   | ... | G   | ... | I   |     |     |     |   |     |   |     |   |     |   |     |   |

Figure S5

|         |      |      |      |      |      |      |      |      |      |      |      |      |
|---------|------|------|------|------|------|------|------|------|------|------|------|------|
|         | 550  | 553  | 555  | 557  | 558  | 564  | 569  | 572  | 574  | 580  |      |      |
| UK1     | K... | E... | R... | K... | F... | I... | D... | N... | I... | A    |      |      |
| 5108111 | K... | E... | R... | K... | F... | I... | D... | N... | I... | A    |      |      |
| DH1834  | K... | E... | R... | K... | F... | I... | D... | N... | I... | A    |      |      |
| DH1858  | K... | E... | R... | K... | F... | I... | D... | N... | I... | A    |      |      |
| CD2315  | M... | A... | N... | I... | P... | V... | G... | K... | K... | I    |      |      |
| M120    | M... | A... | N... | I... | P... | V... | G... | K... | K... | I    |      |      |
| M68     | K... | E... | S... | K... | F... | M... | D... | N... | I... | A    |      |      |
|         | 607  | 608  | 612  | 622  | 624  | 629  | 633  | 644  | 645  | 669  |      |      |
| UK1     | M... | S... | F... | S... | N... | S... | R... | V... | S... | M    |      |      |
| 5108111 | M... | S... | F... | S... | N... | S... | R... | V... | S... | M    |      |      |
| DH1834  | M... | S... | F... | S... | N... | S... | R... | V... | S... | M    |      |      |
| DH1858  | M... | S... | F... | S... | N... | S... | R... | V... | S... | M    |      |      |
| CD2315  | Q... | S... | L... | S... | D... | N... | Q... | I... | P... | I    |      |      |
| M120    | Q... | S... | L... | S... | D... | N... | Q... | I... | P... | I    |      |      |
| M68     | M... | G... | F... | G... | N... | N... | R... | V... | S... | M    |      |      |
|         | 701  | 723  | 745  | 766  | 778  | 786  | 793  | 810  | 816  | 823  |      |      |
| UK1     | P... | T... | E... | S... | I... | I... | D... | K... | R... | M    |      |      |
| 5108111 | P... | T... | E... | S... | I... | I... | D... | K... | R... | M    |      |      |
| DH1834  | P... | T... | E... | S... | I... | I... | D... | K... | R... | M    |      |      |
| DH1858  | P... | T... | E... | S... | I... | I... | D... | K... | R... | M    |      |      |
| CD2315  | R... | N... | A... | A... | V... | V... | E... | N... | G... | V    |      |      |
| M120    | R... | N... | A... | A... | V... | V... | E... | N... | G... | V    |      |      |
| M68     | P... | T... | E... | S... | I... | I... | D... | K... | G... | M    |      |      |
|         | 837  | 850  | 869  | 870  | 884  | 895  | 914  | 917  | 984  | 1013 | 1021 | 1035 |
| UK1     | S... | I... | P... | H... | D... | N... | S... | I... | E... | V... | G... | D    |
| 5108111 | S... | I... | P... | H... | D... | N... | S... | I... | E... | V... | G... | D    |
| DH1834  | S... | I... | P... | H... | D... | N... | S... | I... | E... | V... | G... | D    |
| DH1858  | S... | I... | P... | H... | D... | N... | S... | I... | E... | V... | G... | D    |
| CD2315  | V... | V... | S... | H... | E... | S... | T... | V... | K... | I... | S... | N    |
| M120    | V... | V... | S... | H... | E... | S... | T... | V... | K... | I... | S... | N    |
| M68     | S... | I... | P... | Y... | E... | N... | S... | V... | E... | I... | G... | D    |

Figure S6

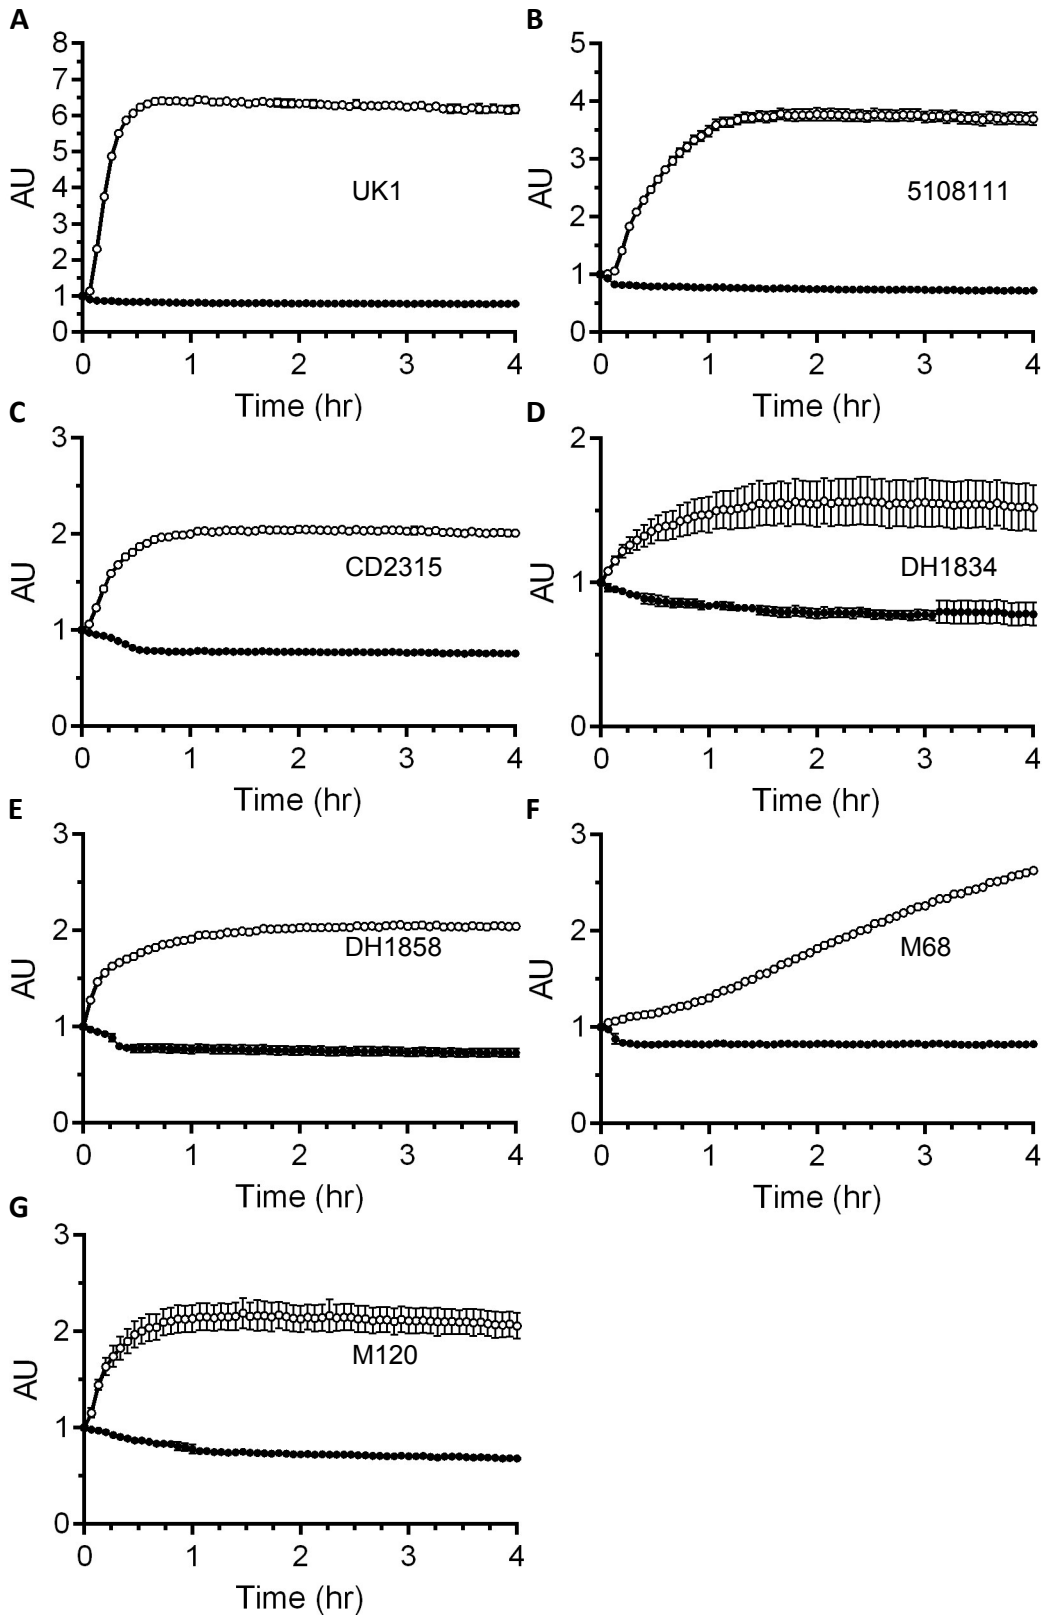

Supplement: JB.00908-15_zjb999093938so1.pdf [file JB.00908-15_zjb999093938so1.pdf]
